# Supplementary material for: Melatonin synergizes BRAF-targeting agent vemurafenib in melanoma treatment by inhibiting iNOS/hTERT signaling and cancer-stem cell traits
Source: Springer Nature journal article supplement (doi:10.1186/s13046-019-1036-z), 2019-02-04

A

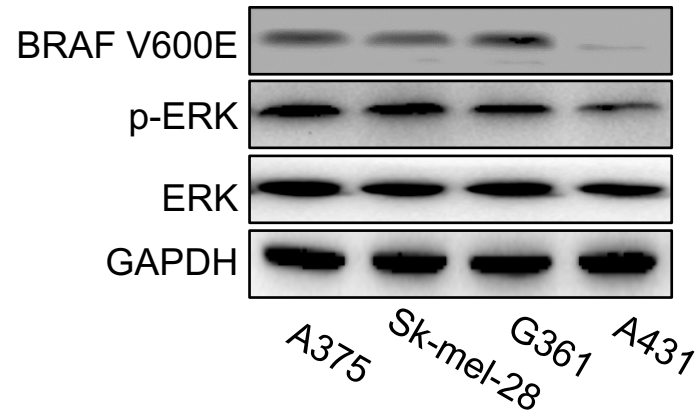

B

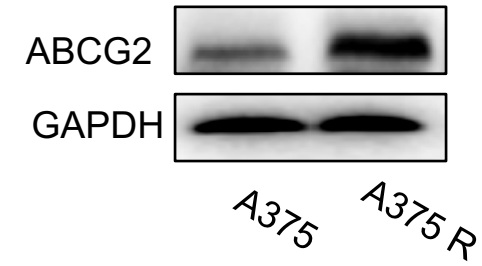

C

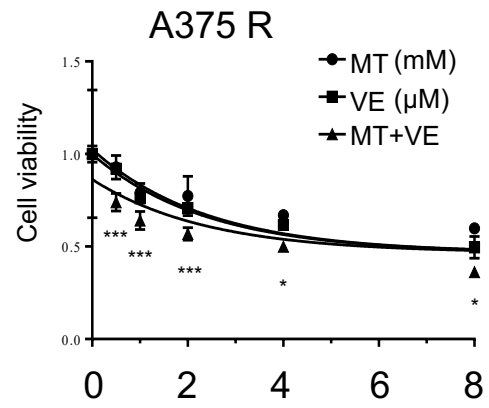

D

| Cell          | IC50    |        |            | Folds       |
|---------------|---------|--------|------------|-------------|
|               | MT(mM)  | VE(μM) | MT(1mM)+VE |             |
| <b>A375 R</b> | 14.2049 | 7.6332 | 2.6223     | <b>2.91</b> |

A

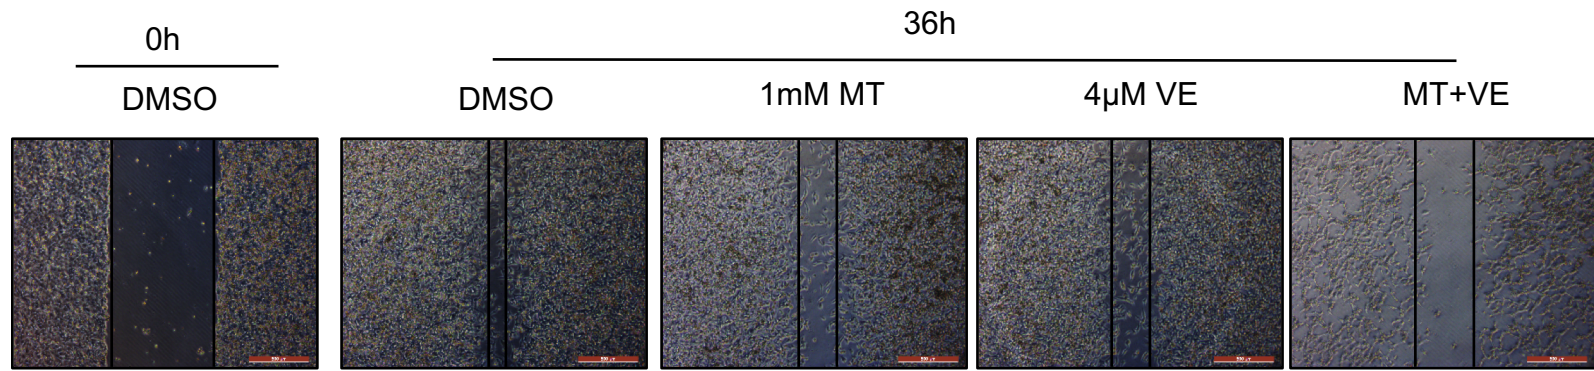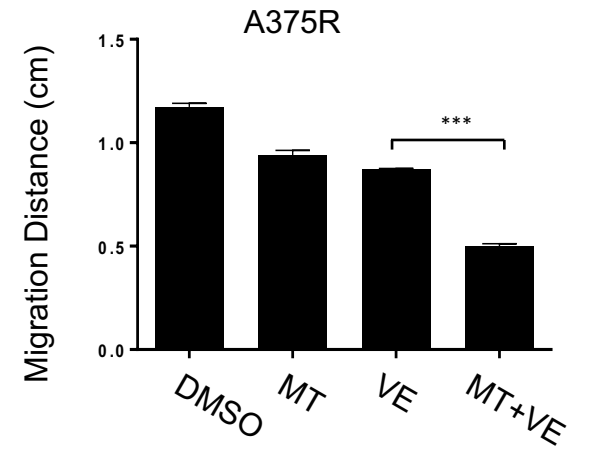

B

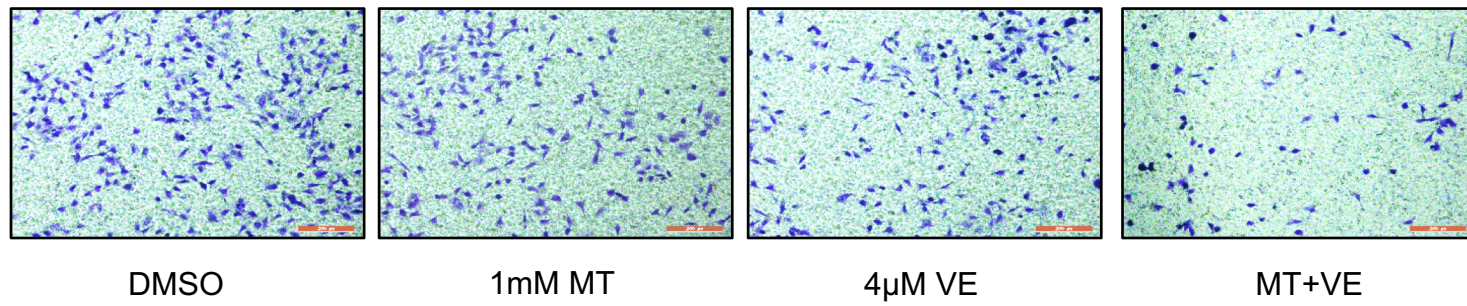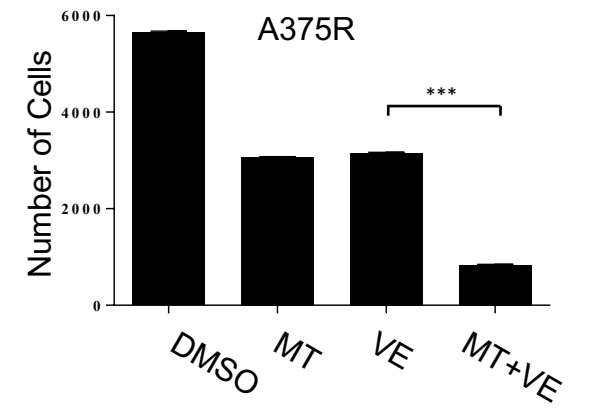

Supplement: MOESM1 [file 16442168]
